# Supplementary material
Source: publisher figshare collection journal article supplement (https://acs.figshare.com/ndownloader/files/5276515)
Supplement: Supplementary file 1 [file 5276515]

## Supporting Information

### Ultralong Rutile TiO<sub>2</sub> Nanowire Arrays for Highly Efficient Dye-Sensitized Solar Cells

Hailiang Li,<sup>†</sup> Qingjiang Yu,<sup>\*,†,||</sup> Yuewu Huang,<sup>†</sup> Cuiling Yu,<sup>\*,†</sup> Renzhi Li,<sup>§</sup> Jinzhong Wang,<sup>†</sup> Fengyun Guo,<sup>†</sup> Shujie Jiao,<sup>†</sup> Shiyong Gao,<sup>†</sup> Yong Zhang,<sup>†</sup> Xitian Zhang,<sup>||</sup> Peng Wang,<sup>\*,§</sup> and Liancheng Zhao<sup>†</sup>

<sup>†</sup>Department of Optoelectronic Information Science, School of Materials Science and Engineering and

<sup>‡</sup>Department of Physics, Harbin Institute of Technology, Harbin 150001, China

<sup>§</sup>State Key Laboratory of Polymer Physics and Chemistry, Changchun Institute of Applied Chemistry, Chinese Academy of Sciences, Changchun 130022, China

<sup>||</sup>Key Laboratory for Photonic and Electric Bandgap Materials, Ministry of Education, Harbin Normal University, Harbin 150025, China

---

\*Corresponding authors: qingjiang.yu@hit.edu.cn; cuiling.yu@hit.edu.cn; peng.wang@ciac.ac.cn

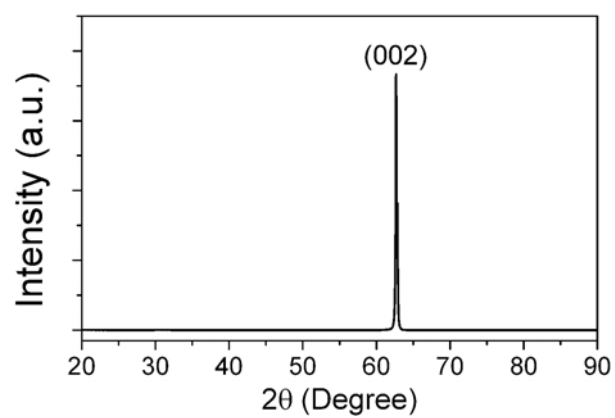

**Figure S1.** XRD patterns of TiO<sub>2</sub> NWAs prepared in the solution with 3 mL of TiCl<sub>4</sub>, 20 mL of ethanol, 10 mL of DI water, and 30 mL of concentrated HCl at 150 °C for 12 h.

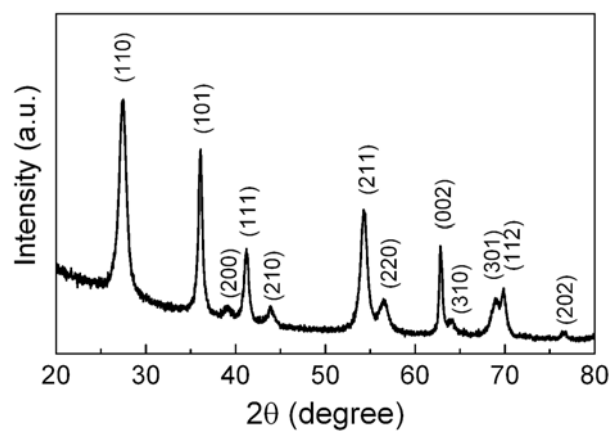

**Figure S2.** XRD patterns of TiO<sub>2</sub> NWs as a powder form that can be prepared by grinding the TiO<sub>2</sub> NWAs grown in the solution with 3 mL of TiCl<sub>4</sub>, 20 mL of ethanol, 10 mL of DI water, and 30 mL of concentrated HCl at 150 °C for 12 h.

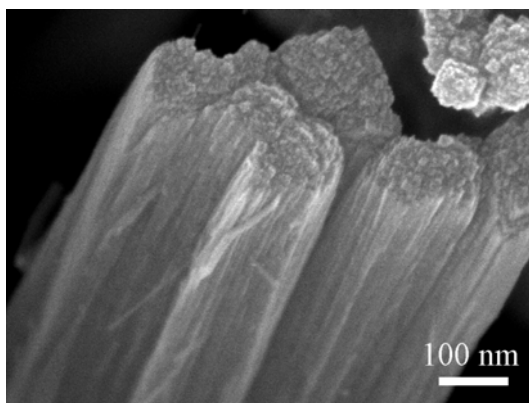

**Figure S3.** FESEM image of broken  $\text{TiO}_2$  NWAs prepared in the solution with 3 mL of  $\text{TiCl}_4$ , 30 mL of DI water, and 30 mL of concentrated HCl at 150 °C for 12 h.

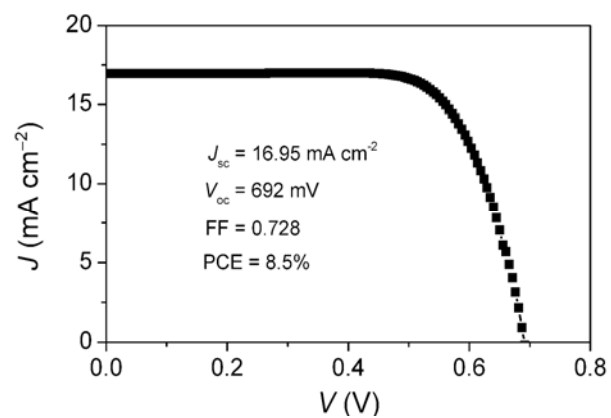

**Figure S4.**  $J$ – $V$  characteristics of the DSC based on the N719-sensitized  $\text{TiO}_2$  NWAs prepared in the reaction solution with 20 mL of ethanol.

**Table S1. Detailed simulative values of recombination resistance ( $R_2$ ) and electron lifetime ( $\tau_r$ ) values from EIS spectra.**

| DSCs   | $R_2$ (ohm) | $\tau_r$ (s) |
|--------|-------------|--------------|
| DSC-0  | 616.2       | 0.461        |
| DSC-10 | 247.6       | 0.331        |
| DSC-20 | 199.3       | 0.315        |
| DSC-30 | 143.5       | 0.298        |

**Table S2. Detailed photovoltaic and simulative EIS parameters of DSCs based on TiO<sub>2</sub> NWAs prepared in the solution with 3 mL of TiCl<sub>4</sub>, 20 mL of ethanol, 10 mL of DI water, and 30 mL of concentrated HCl at 150 °C for different reaction times.**

| Reaction time (h) | Film thickness (μm) | $J_{sc}$ (mA cm <sup>-2</sup> ) | $V_{oc}$ (mV) | FF    | PCE (%) | Dye loading (nmol cm <sup>-2</sup> ) | $R_2$ (ohm) | $\tau_r$ (s) | $L_n$ (μm) |
|-------------------|---------------------|---------------------------------|---------------|-------|---------|--------------------------------------|-------------|--------------|------------|
| 1                 | 7                   | 5.39                            | 712           | 0.740 | 2.8     | 27.2                                 | 242.9       | 0.328        | 134.7      |
| 3                 | 26                  | 13.37                           | 698           | 0.738 | 6.9     | 151.6                                | 221.7       | 0.321        | 122.8      |
| 9                 | 32                  | 16.12                           | 690           | 0.742 | 8.2     | 352.5                                | 207.5       | 0.317        | 110.2      |
| 12                | 44                  | 17.38                           | 687           | 0.747 | 8.9     | 426.4                                | 199.3       | 0.315        | 102.3      |

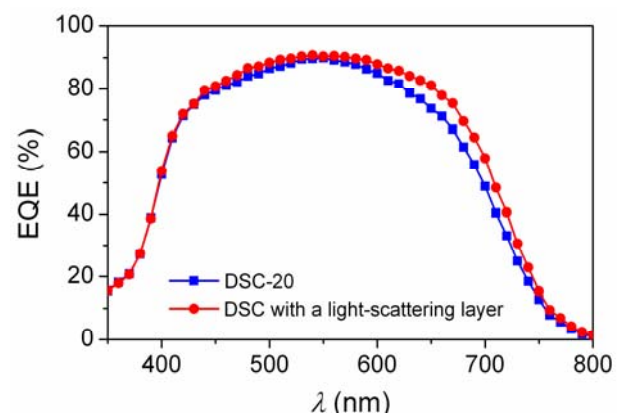

**Figure S5.** EQE spectra of the DSC-20 and DSC with a light-scattering layer.



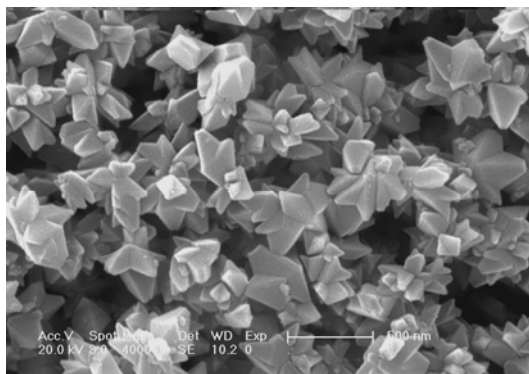

**Figure S6.** FESEM image of the light-scattering particles.
